# Supplementary material for: Pseudomonas species isolated via high-throughput screening significantly protect cotton plants against verticillium wilt
Source: PubMed Central journal article supplement (PMC7593376; doi:10.1186/s13568-020-01132-1), 2020-10-28
Supplement: 13568_2020_1132_MOESM1_ESM.pdf [file 13568_2020_1132_MOESM1_ESM.pdf]

## AMB Express

### ***Pseudomonas* species isolated via high-throughput screening significantly protect cotton plants against verticillium wilt**

Xiaoyuan Tao<sup>1</sup>, Hailin Zhang<sup>1</sup>, Mengtao Gao<sup>2</sup>, Menglin Li<sup>2</sup>, Ting Zhao<sup>1</sup>, Xueying Guan<sup>1\*</sup>

<sup>1</sup> College of Agriculture and Biotechnology, Zhejiang University, Hangzhou, 310058, China

<sup>2</sup> State Key Laboratory of Crop Genetics and Germplasm Enhancement, Cotton Hybrid R & D Engineering Center (the Ministry of Education), College of Agriculture, Nanjing Agricultural University, Nanjing 210095, China.

\* Corresponding author. Correspondence should be addressed to X. Guan

([xueyingguan@zju.edu.cn](mailto:xueyingguan@zju.edu.cn))

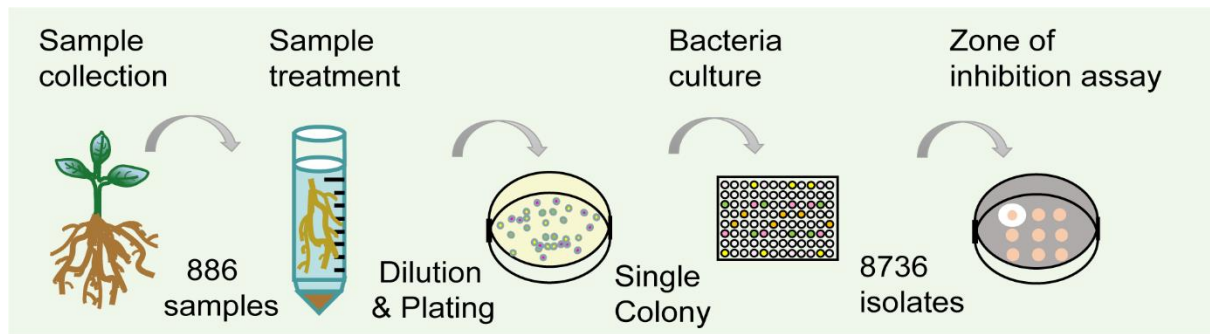

**Figure S1.** Schematic diagram showing work flow for high-throughput screening.

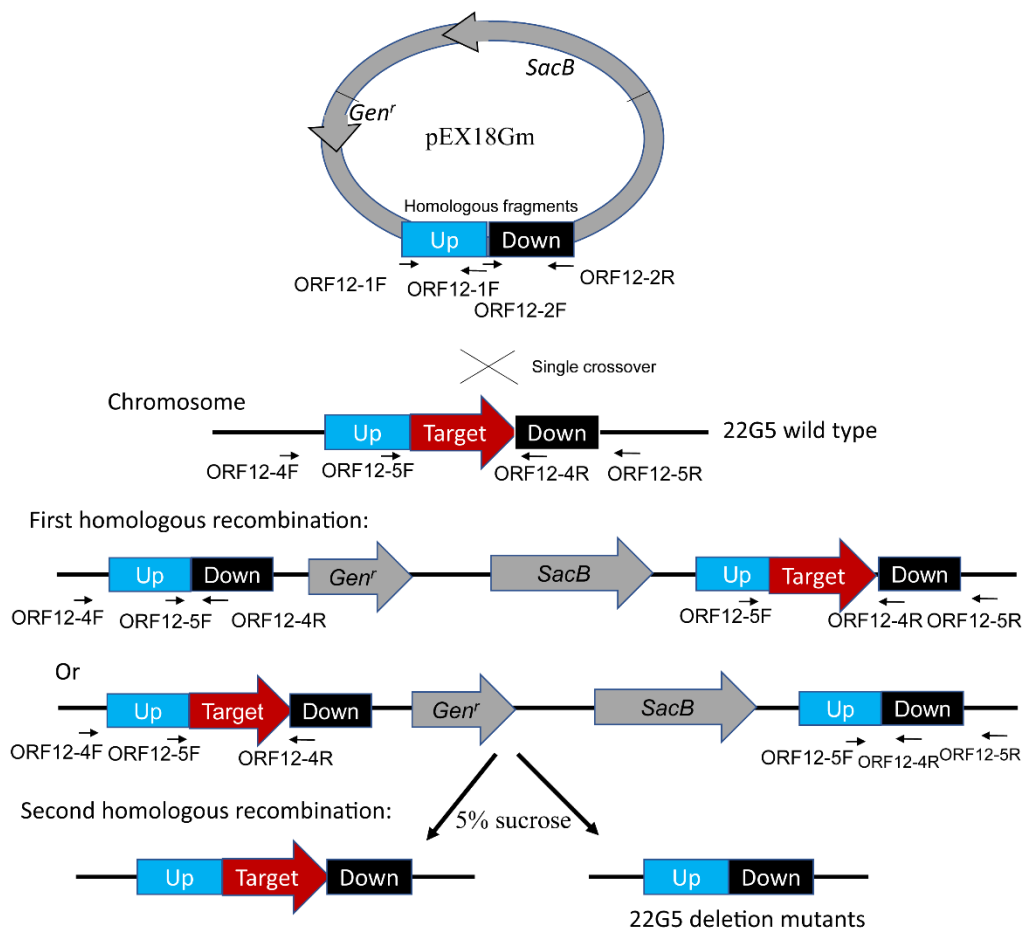

**Figure S2.** Schematic diagram illustrating the use of the pEX18Gm suicide plasmids to generate a gene deletion in *P. donghuensis* 22G5. Picture was modified from the reference (Wang et al. 2015). Refer to Table S2 for detailed primer sequences.

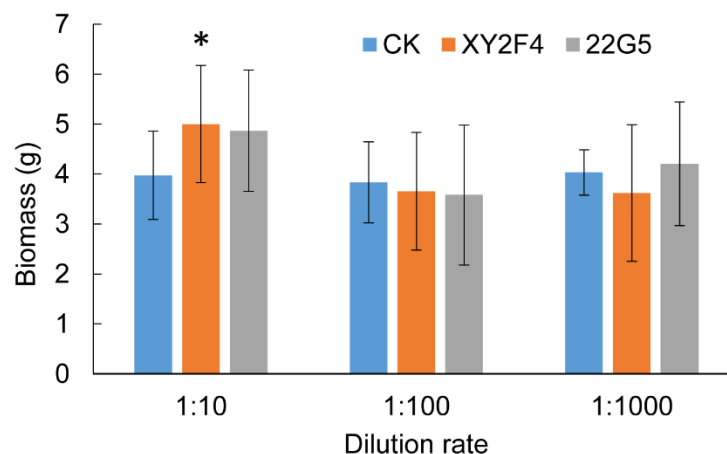

**Figure S3. Plant growth promoting and biosafety tests of *P. protegens* XY2F4 and *P. donghuensis* 22G5.** 7-day old cotton seedlings with treatments of different concentrations of *Pseudomonas* strains (XY2F4 and 22G5) and the LB control (CK), biomass were recorded three weeks after inoculation. 1:10, 1:10 dilution of overnight culture,  $\sim 1 \times 10^7$  CFU/mL; 1:100,  $\sim 1 \times 10^6$  CFU/mL; 1:1000,  $\sim 1 \times 10^5$  CFU/mL. \*  $P < 0.05$ . Student's t test.

**Table S1 Informations of plant rhizosphere samples.**

| Location               | Plant type            | Collection time (year.month) | Plant rhizosphere samples No. | 96 plate No. |
|------------------------|-----------------------|------------------------------|-------------------------------|--------------|
| Dangtu, Anhui          | Cotton & Weeds & Rice | 2107.6                       | 1-60                          | 1-7          |
| Dangtu, Anhui          | Tea                   | 2017.6                       | 61-77                         | 8-9          |
| Hangzhou, Zhejiang     | Soybean               | 2107.6                       | 78-150                        | 10-14        |
| Hangzhou, Zhejiang     | Tea                   | 2017.6                       | 151-156                       |              |
| Shihezi, Xinjiang      | Cotton                | 2017.7                       | 157-183                       | 15-21        |
| Dangtu, Anhui          | Cotton & Weeds        | 2107.7                       | 184-202                       |              |
| Baihe, Jilin           | Weeds                 | 2017.8                       | 203-217                       | 22-23        |
| Dongyan, Zhejiang      | Sorghum, Sesame       | 2017.8                       | 218-261                       | 24-27        |
| Zhangjiajie, Hebei     | Weeds                 | 2017.8                       | 262-275                       |              |
| Dangtu, Anhui          | Cotton                | 2017.9                       | 276-288                       | 28-29        |
| Zhoushan, Zhejiang     | Weeds                 | 2107.9                       | 289-328                       | 30-34        |
| Haerbing, Heilongjiang | Weeds                 | 2017.9                       | 329-361                       | 35-37        |
| Suzhou, Jiangsu        | Weeds                 | 2017.10                      | 376-373                       | 38-43        |
| Yancheng, Shandong     | Weeds                 | 2017.10                      | 374-385                       |              |
| Xuzhou, Jiangsu        | Cotton & Weeds        | 2017.10                      | 386-413                       |              |
| Dangtu, Anhui          | Cotton & Weeds & Rice | 2017.11                      | 414-846                       | 44-88        |
| Shanghai               | Cotton                | 2018.4                       | 847-886                       | 89-91        |

**Table S2. Primer used in this study.**

| Name     | Sequence (5'-3')               | Usage                                                |
|----------|--------------------------------|------------------------------------------------------|
| 27F      | AGAGTTTGATCMTGGCTCAG           | 16S rDNA                                             |
| 1492R    | TACGGYTACCTTGTTACGACTT         |                                                      |
| ORF12-1F | TGTACGGGTCATGGAAGTGCA          | Gene mutation,for upstream fragment                  |
| ORF12-1R | ttacctgcaatcacgTCTTTGAACCGGCAG | PCR                                                  |
| ORF12-2F | CTGCCGGTTCAAAGAcgtgattgcaggtaa | Gene mutation,for downstream fragment                |
| ORF12-2R | TGATCGAGCTGGACAAGCAGA          | PCR                                                  |
| ORF12-3F | cccggatccTGTACGGGTCATGGAAGTGCA | Gene mutation, for upstream plus downstream fragment |
| ORF12-3R | cccaagcttTGATCGAGCTGGACAAGCAGA | PCR                                                  |
| ORF12-4F | GCAGCCTCGGGTTTCACCGCCCGCCAGCTG | For first allelic exchange PCR identification        |
| ORF12-4R | TCGAACAAGCGGCCAGTACCGGCAGTGTGC |                                                      |
| ORF12-5F | TCGCCAAAGCGTGCTCGATGCCGTGCAGA  | For first allelic exchange PCR identification        |
| ORF12-5R | TGCGGGCGGATCAGCTCGGTGCGCATCAAC |                                                      |
| ORF12-6F | TGTACGGGTCATGGAAGTGC           | For second allelic exchange PCR identification       |
| ORF12-6R | AGATTGAACACTGGCAGGGG           |                                                      |
| ORF12-7F | CTGTTTGCCTTACTGCGACG           | For second allelic exchange PCR identification       |
| ORF12-7R | CCTGGCGATGCTCTAGTTGT           |                                                      |

**Table S3 Genome summary of *Pseudomonas* strains.**

|                       | <i>P. protegens</i><br>XY2F4 | <i>P. donghuensis</i><br>22G5 | <i>P. lini</i><br>25D11 | <i>P. putida</i><br>25E1 |
|-----------------------|------------------------------|-------------------------------|-------------------------|--------------------------|
| Genome size (bp)      | 6,811,381                    | 5,726,777                     | 7,870,958               | 6,975,274                |
| Number of contigs     | 50                           | 51                            | 4451                    | 1205                     |
| GC content (%)        | 63.6                         | 62.2                          | 58.7                    | 61.2                     |
| CDS                   | 6153                         | 5339                          | 10361                   | 7140                     |
| Average CDS size (bp) | 969                          | 964                           | 661                     | 823                      |
| rRNA                  | 8                            | 4                             | 5                       | 4                        |
| tRNA                  | 60                           | 60                            | 71                      | 84                       |

**Table S4 RAST Annotation of unique genes in XY2F4.**

| Feature                        | Counts |
|--------------------------------|--------|
| Widespread_colonization_island | 10     |
| General_Secretion_Pathway      | 9      |
| Orphan_regulatory_proteins     | 5      |

|                                                                    |   |
|--------------------------------------------------------------------|---|
| Methionine_Biosynthesis                                            | 4 |
| Rhamnose_containing_glycans                                        | 4 |
| Biphenyl_Degradation                                               | 3 |
| Butanol_Biosynthesis                                               | 3 |
| Cinnamic_Acid_Degradation                                          | 3 |
| Cresol_degradation                                                 | 3 |
| Glutathione:_Non-redox_reactions                                   | 3 |
| Lacto-N-Biose_I_and_Galacto-N-Biose_Metabolic_Pathway              | 3 |
| Lactose_and_Galactose_Uptake_and_Utilization                       | 3 |
| N-linked_Glycosylation_in_Bacteria                                 | 3 |
| Polyamine_Metabolism                                               | 3 |
| Restriction-Modification_System                                    | 3 |
| Universal_stress_protein_family                                    | 3 |
| 5-FCL-like_protein                                                 | 2 |
| Bacterial_hemoglobins                                              | 2 |
| Biotin_biosynthesis                                                | 2 |
| Capsular_heptose_biosynthesis                                      | 2 |
| Chitin_and_N-acetylglucosamine_utilization                         | 2 |
| Conserved_gene_cluster_possibly_involved_in_RNA_metabolism         | 2 |
| D-galactarate,_D-glucarate_and_D-glycerate_catabolism              | 2 |
| Fatty_acid_metabolism_cluster                                      | 2 |
| Fermentations:_Lactate                                             | 2 |
| Fermentations:_Mixed_acid                                          | 2 |
| Glutamine,_Glutamate,_Aspartate_and_Asparagine_Biosynthesis        | 2 |
| Glycerate_metabolism                                               | 2 |
| Glycerolipid_and_Glycerophospholipid_Metabolism_in_Bacteria        | 2 |
| Maltose_and_Maltodextrin_Utilization                               | 2 |
| Methylglyoxal_Metabolism                                           | 2 |
| NAD_and_NADP_cofactor_biosynthesis_global                          | 2 |
| n-Phenylalkanoic_acid_degradation                                  | 2 |
| Pentose_phosphate_pathway                                          | 2 |
| Phd-Doc,_YdcE-YdcD_toxin-antitoxin_(programmed_cell_death)_systems | 2 |
| Putrescine_utilization_pathways                                    | 2 |
| Ton_and_Tol_transport_systems                                      | 2 |
| Toxin-antitoxin_replicon_stabilization_systems                     | 2 |
| Two_partner_secretion_pathway_(TPS)                                | 2 |
| Type_I_Restriction-Modification                                    | 2 |
| Acetyl-CoA_fermentation_to_Butyrate                                | 1 |
| Allantoin_Utilization                                              | 1 |
| Amidase_clustered_with_urea_and_nitrile_hydratase_functions        | 1 |
| Archaeal_lipids                                                    | 1 |
| Benzoate_transport_and_degradation_cluster                         | 1 |
| Broadly_distributed_proteins_not_in_subsystems                     | 1 |
| Butyrate_metabolism_cluster                                        | 1 |
| carbazol_degradation_cluster                                       | 1 |
| Carbon_monoxide_oxidation                                          | 1 |
| Cell_division-ribosomal_stress_proteins_cluster                    | 1 |
| Central_meta-cleavage_pathway_of_aromatic_compound_degradation     | 1 |
| Chorismate_Synthesis                                               | 1 |

|                                                                                  |   |
|----------------------------------------------------------------------------------|---|
| CMP-N-acetylneuraminate_Biosynthesis                                             | 1 |
| Coenzyme_M_biosynthesis                                                          | 1 |
| Colanic_acid_biosynthesis                                                        | 1 |
| Common_Pathway_For_Synthesis_of_Aromatic_Compounds_(DAHP_synthase_to_chorismate) | 1 |
| Copper_homeostasis                                                               | 1 |
| Creatine_and_Creatinine_Degradation                                              | 1 |
| Cyanophycin_Metabolism                                                           | 1 |
| Cysteine_Biosynthesis                                                            | 1 |
| D-gluconate_and_ketogluconates_metabolism                                        | 1 |
| dTDP-rhamnose_synthesis                                                          | 1 |
| Ethylmalonyl-CoA_pathway_of_C2_assimilation                                      | 1 |
| Fosfomycin_resistance                                                            | 1 |
| Gentisate_degradation                                                            | 1 |
| Glutamate_and_Aspartate_uptake_in_Bacteria                                       | 1 |
| Glutathione:_Biosynthesis_and_gamma-glutamyl_cycle                               | 1 |
| Iron_siderophore_sensor_&_receptor_system                                        | 1 |
| Lactose_utilization                                                              | 1 |
| L-rhamnose_utilization                                                           | 1 |
| Lysine_degradation                                                               | 1 |
| Lysine_fermentation                                                              | 1 |
| Magnesium_transport                                                              | 1 |
| Mannose_Metabolism                                                               | 1 |
| Methionine_Degradation                                                           | 1 |
| O-Methyl_Phosphoramidate_Capsule_Modification_in_Campylobacter                   | 1 |
| Oxidative_stress                                                                 | 1 |
| Phosphate-binding_DING_proteins                                                  | 1 |
| p-Hydroxybenzoate_degradation                                                    | 1 |
| Poly-gamma-glutamate_biosynthesis                                                | 1 |
| Polyhydroxybutyrate_metabolism                                                   | 1 |
| Proline,_4-hydroxyproline_uptake_and_utilization                                 | 1 |
| Purine_Utilization                                                               | 1 |
| Quinate_degradation                                                              | 1 |
| Respiratory_dehydrogenases_1                                                     | 1 |
| Ribonucleases_in_Bacillus                                                        | 1 |
| Salicylate_and_gentisate_catabolism                                              | 1 |
| Siderophore_Achromobactin                                                        | 1 |
| Siderophore_Aerobactin                                                           | 1 |
| Soluble_cytochromes_and_functionally_related_electron_carriers                   | 1 |
| Threonine_and_Homoserine_Biosynthesis                                            | 1 |
| Transcription_factors_bacterial                                                  | 1 |
| Transcription_initiation,_bacterial_sigma_factors                                | 1 |
| Trans-envelope_signaling_system_VreARI_in_Pseudomonas                            | 1 |
| Translation_termination_factors_bacterial                                        | 1 |
| tRNA_aminoacylation,_Asp_and_Asn                                                 | 1 |
| tRNA_aminoacylation,_Cys                                                         | 1 |
| tRNA_aminoacylation,_Glu_and_Gln                                                 | 1 |
| tRNA_aminoacylation,_Val                                                         | 1 |
| Utilization_of_glutathione_as_a_sulphur_source                                   | 1 |
| Xanthine_dehydrogenase_subunits                                                  | 1 |

---

**Table S5 RAST Annotation of unique genes in 22G5.**

| <b>Feature</b>                                              | <b>Counts</b> |
|-------------------------------------------------------------|---------------|
| Type_I_Restriction-Modification                             | 2             |
| Restriction-Modification_System                             | 2             |
| n-Phenylalkanoic_acid_degradation                           | 2             |
| Leucine_Degradation_and_HMG-CoA_Metabolism                  | 2             |
| Iron_siderophore_sensor_&_receptor_system                   | 2             |
| Fatty_acid_metabolism_cluster                               | 2             |
| CMP-N-acetylneuraminate_Biosynthesis                        | 2             |
| Rhamnose_containing_glycans                                 | 1             |
| pVir_Plasmid_of_Campylobacter                               | 1             |
| Polyhydroxybutyrate_metabolism                              | 1             |
| Phage_tail_proteins                                         | 1             |
| N-linked_Glycosylation_in_Bacteria                          | 1             |
| Lysine_fermentation                                         | 1             |
| Lactose_and_Galactose_Uptake_and_Utilization                | 1             |
| Lacto-N-Biose_I_and_Galacto-N-Biose_Metabolic_Pathway       | 1             |
| Isoleucine_degradation                                      | 1             |
| HMG_CoA_Synthesis                                           | 1             |
| Glutamine,_Glutamate,_Aspartate_and_Asparagine_Biosynthesis | 1             |
| Glutamate_and_Aspartate_uptake_in_Bacteria                  | 1             |
| Exopolysaccharide_Biosynthesis                              | 1             |
| DNA_repair,_bacterial_RecFOR_pathway                        | 1             |
| DNA_repair,_bacterial                                       | 1             |
| Butyrate_metabolism_cluster                                 | 1             |
| Butanol_Biosynthesis                                        | 1             |
| Biotin_biosynthesis                                         | 1             |
| Acetyl-CoA_fermentation_to_Butyrate                         | 1             |
